# Supplementary material for: Atmospheric ammonia retrieval from the TANSO-FTS/GOSAT thermal infrared sounder
Source: Copernicus journal article supplement (doi:10.5194/amt-13-309-2020), 2020-01-29
Supplement: Supplementary file 1 [file amt-13-309-2020-supplement.pdf]

Supplement of Atmos. Meas. Tech., 13, 309–321, 2020  
<https://doi.org/10.5194/amt-13-309-2020-supplement>  
© Author(s) 2020. This work is distributed under  
the Creative Commons Attribution 4.0 License.

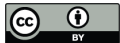

*Supplement of*

## **Atmospheric ammonia retrieval from the TANSO-FTS/GOSAT thermal infrared sounder**

**Yu Someya et al.**

*Correspondence to:* Yu Someya (someya.yu@nies.go.jp)

The copyright of individual parts of the supplement might differ from the CC BY 4.0 License.

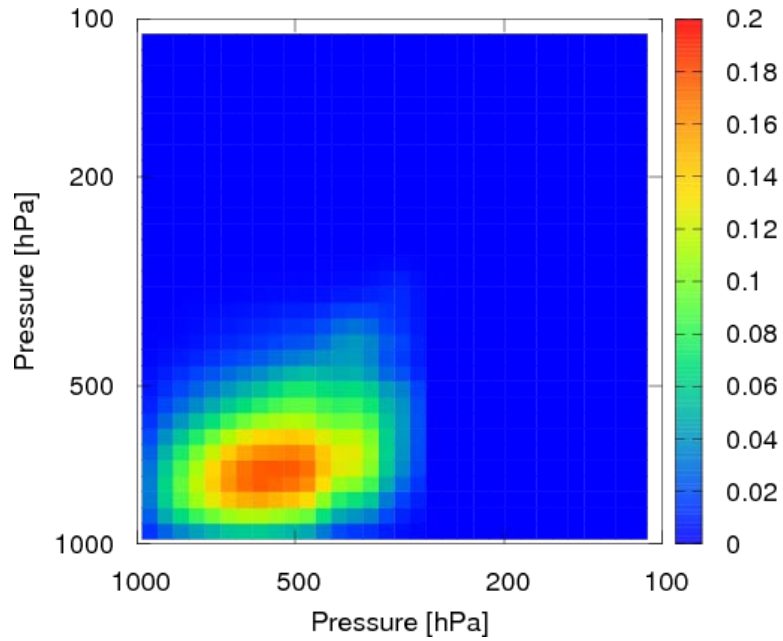

5 **Figure S1.** An example of the averaging kernel matrix for the GOSAT TIR ammonia profile retrieval using the AFGL ammonia profile and mid-latitude summer atmosphere.

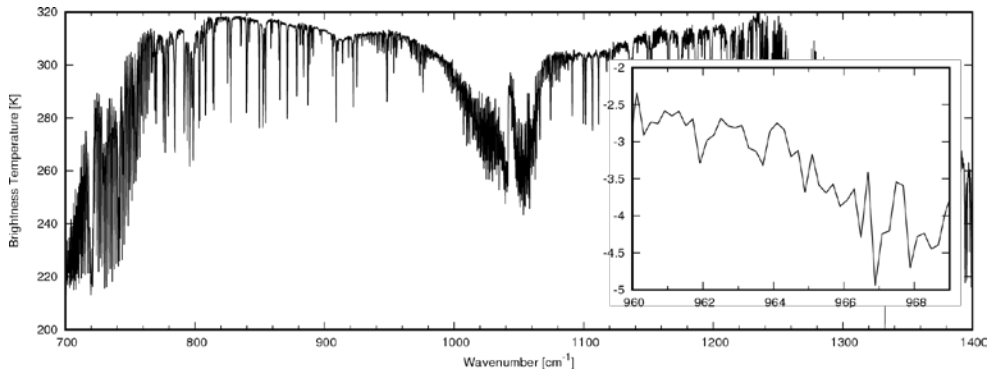

**Figure S2.** An example of a GOSAT TIR spectrum affected by dust aerosols at (0.86°E, 29.17°N) on 22 July 2010.

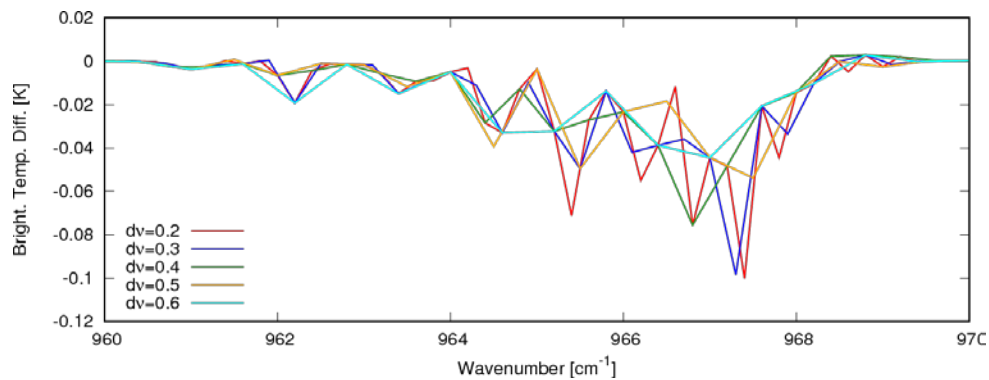

**Figure S3.** Brightness temperature differences between spectra simulated with and without including ammonia, using the GOSAT instrumental line shape function with spectral resolutions between 0.2 and 0.6 cm<sup>-1</sup> as indicated in the legend. These simulations used a mid-latitude summer profile for ammonia with a total column of  $4.56 \times 10^{15}$  molec/cm<sup>2</sup>.
